# Supplementary material for: A family of Type VI secretion system effector proteins that form ion-selective pores
Source: PubMed Central journal article supplement (PMC6889166; doi:10.1038/s41467-019-13439-0), 2019-12-02
Supplement: 41467_2019_13439_MOESM1_ESM.pdf [file 41467_2019_13439_MOESM1_ESM.pdf]

## **Supplementary Information**

A family of Type VI secretion system effector proteins that form ion-selective pores

Mariano *et al.*

## Supplementary Figure 1

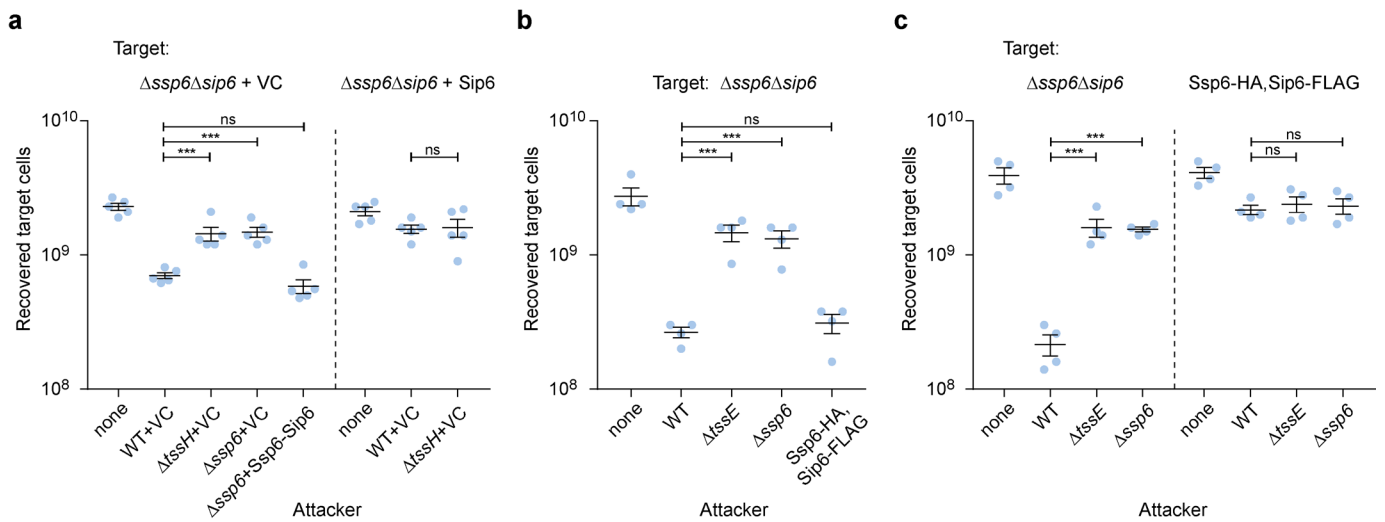

**Supplementary Figure 1. Complementation and functionality of strains carrying *Ssp6* and *Sip6* deletions or epitope tag fusions.** (a) Recovery of target strain *S. marcescens* Db10  $\Delta ssp6\Delta sip6$  carrying the empty vector control (+VC, pSUPROM) or a plasmid directing the expression of Sip6-HA (+Sip6), following 7.5 h co-culture with wild type (WT) or mutant strains ( $\Delta tssH$ ,  $\Delta ssp6$ ) of Db10 carrying the empty vector control (+VC, pBAD18-Kan) or a plasmid directing the expression of *Ssp6* and *Sip6* (+Ssp6-Sip6). Expression of *Ssp6* and *Sip6* was induced by addition of 0.02% L-arabinose; *Sip6* was included in the *Ssp6* construct to prevent toxicity from overexpression of *Ssp6*. (b) Recovery of the  $\Delta ssp6\Delta sip6$  mutant following co-culture with wild type *S. marcescens* Db10, the  $\Delta tssE$  mutant and the strain encoding *Ssp6*-HA and *Sip6*-FLAG fusion proteins at the normal chromosomal location. (c) Recovery of the wild type and the strain encoding *Ssp6*-HA and *Sip6*-FLAG fusion proteins as targets, when co-cultured with wild type,  $\Delta tssE$  or  $\Delta ssp6$  attackers. All target strains used in the study represent streptomycin-resistant derivatives of the strain indicated. In all parts, individual data points are overlaid with the mean  $\pm$  SEM (n=4 biological replicates, or n=5 in part a; \*\*\* indicates p<0.001, ns indicates not significant, one-way ANOVA with Dunnett's test; except for the  $\Delta ssp6\Delta sip6$  + VC target in part a, where a two-tailed t-test was used); none, target cells incubated with sterile media alone. Source data are provided as a Source Data file.

## Supplementary Figure 2

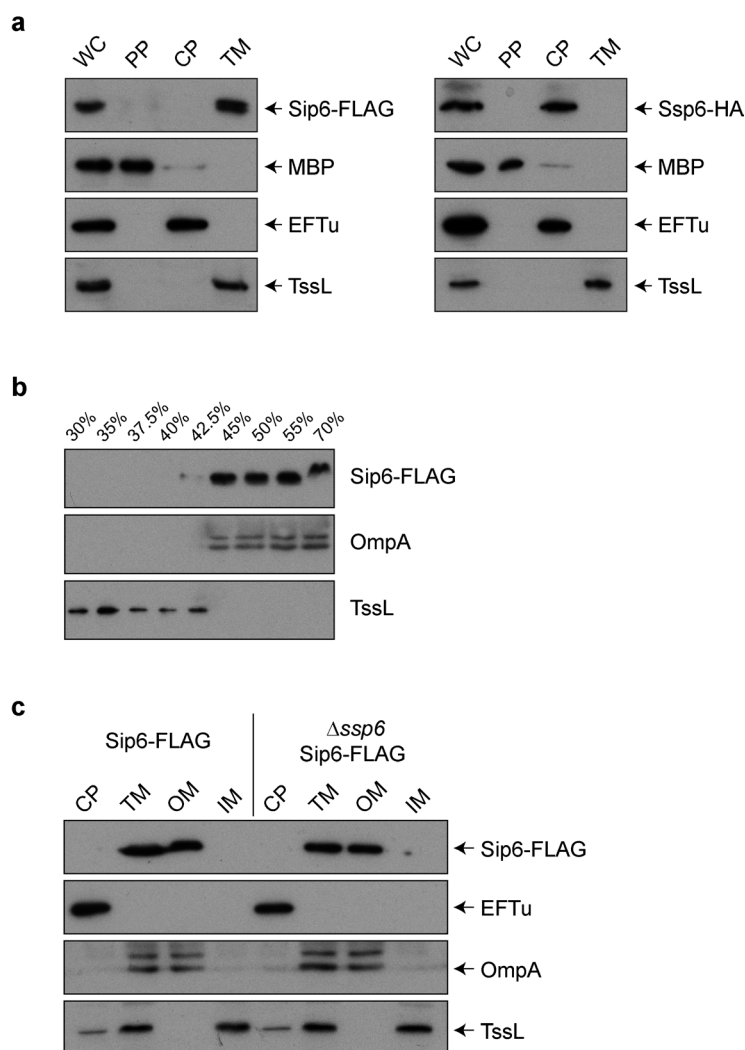

**Supplementary Figure 2. Subcellular localisation of Sip6 and Ssp6.** (a) Cells of *S. marcescens* Db10 carrying chromosomally-encoded Sip6-FLAG (left hand panel) or Ssp6-HA (right hand panel) were fractionated into whole cell (WC), periplasm (PP), cytoplasm (CP) and total membrane (TM) fractions and the fractions were analysed by immunoblot detection of the FLAG epitope, the HA epitope, MBP (periplasmic control protein), EFTu (cytoplasmic control protein) and TssL (integral membrane protein). (b) Total membrane fractions from *S. marcescens* Db10 carrying Sip6-FLAG were separated by discontinuous sucrose gradient centrifugation and analysed by immunoblot detection of OmpA (outer membrane control protein) and TssL (inner membrane control protein). The percentage of sucrose in each fraction is given along the top. (c) Cells of *S. marcescens* Db10 carrying Sip6-FLAG in the wild type or the  $\Delta$ *ssp6* background were fractionated into cytoplasm, total membrane, inner membrane (IM) and outer membrane (OM) fractions and the fractions analysed by immunoblot detection using antibodies as above. In all parts, the cells were grown in liquid culture, preventing productive T6SS-mediated translocation of effectors between cells. Therefore the cells can be considered as ‘attackers’ and the localisations as ‘pre-secretion’, since any secreted effectors will be released to the media. Source data are provided as a Source Data file.

## Supplementary Figure 3

### a Analysis of *Serratia marcescens* co-cultures

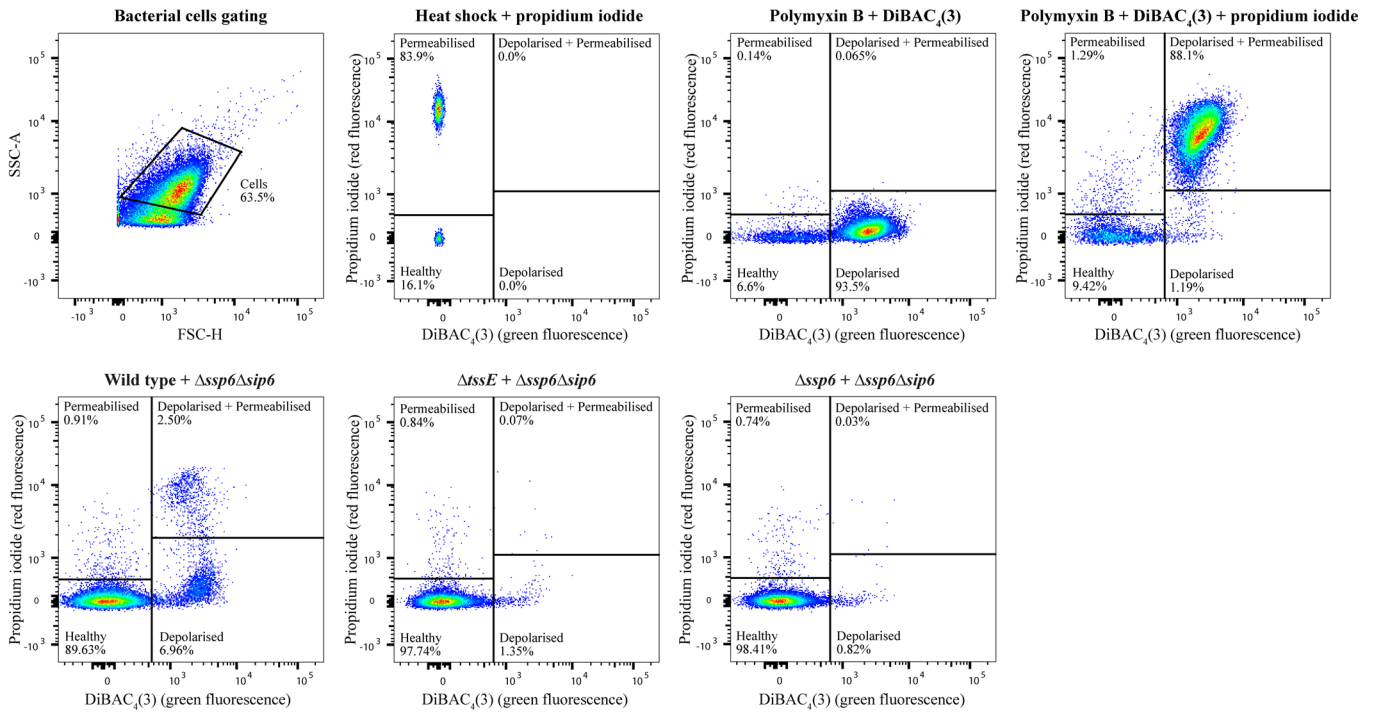

### b Analysis of *E. coli* expressing Ssp6

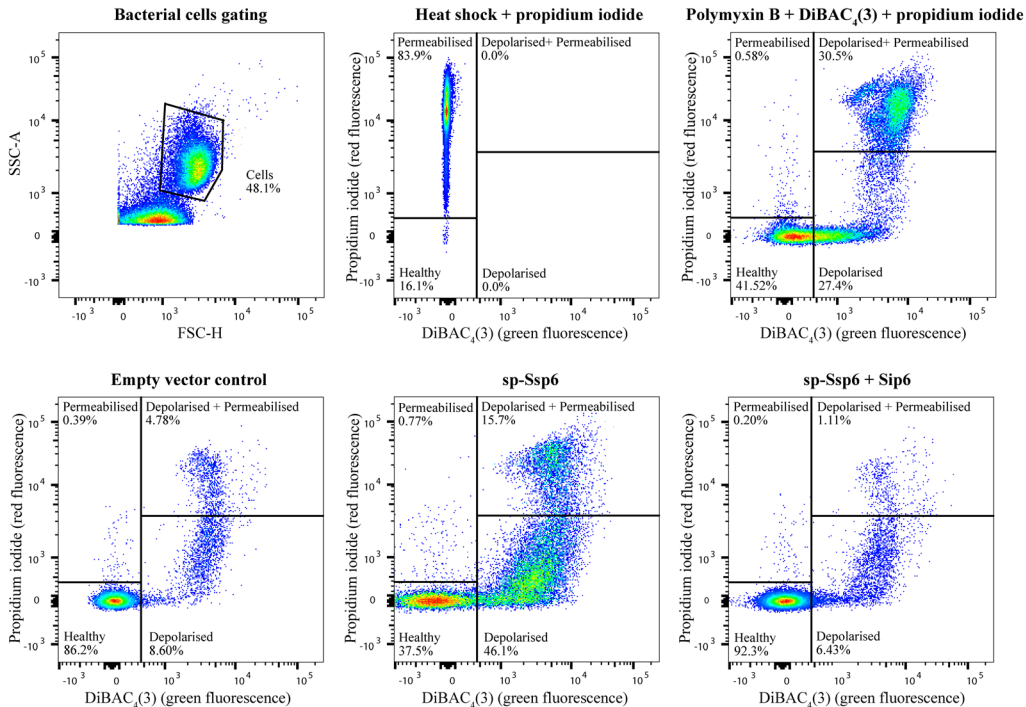

**Supplementary Figure 3. Examples of individual flow cytometry experiments from the analyses presented in Figure 3. (a) Analysis of *S. marcescens* co-culture experiments, as Figure 3a. Top panels illustrate the gating strategy. Bacterial cells were selected using side scatter (SSC-A) vs. forward scatter (FSC-H). Cells subjected to heat shock treatment and stained with propidium iodide only were used to**

define the permeabilized cells quadrant (red fluorescence), whilst treatment with 300 µg/mL polymyxin B and staining with DiBAC<sub>4</sub>(3) only was used to define the depolarised cells quadrant (green fluorescence). Cells treated with polymyxin B and stained with DiBAC<sub>4</sub>(3) and propidium iodide were used to establish the quadrant for cells that are simultaneously depolarised and permeabilized (green and red fluorescence). Bottom panels show representative plots from experiments involving co-culture of the Ssp6-susceptible target strain  $\Delta ssp6\Delta sip6$  with wild type (WT) or control ( $\Delta ssp6$  or  $\Delta tssE$ ) attacker strains of *S. marcescens* Db10, followed by simultaneous staining with propidium iodide and DiBAC<sub>4</sub>(3). (b) Analysis of *E. coli* cells expressing sp-Ssp6, as Figure 3b. Top panels illustrate the gating strategy. Bacterial cells were selected using SSC-A vs. FSC-H. Cells subjected to heat shock treatment and stained with propidium iodide only were used to define the permeabilized cells quadrant (red fluorescence), whilst treatment with 2 µg/mL polymyxin B and staining with both propidium iodide and DiBAC<sub>4</sub>(3) defined the quadrant of cells that are simultaneously depolarised and permeabilized (green and red fluorescence) and determined the separation from the quadrant containing cells that are depolarised but not permeabilised (green fluorescence). Bottom panels show representative plots from experiments analysing *E. coli* cells expressing sp-Ssp6 or sp-Ssp6 + Sip6, or healthy control cells carrying the empty vector (VC).

### Supplementary Figure 4

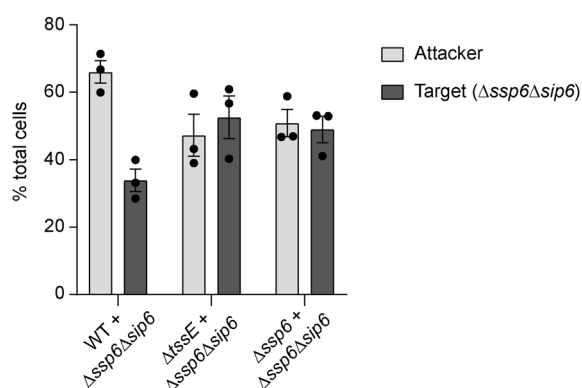

**Supplementary Figure 4. Quantification of the relative proportion of attacker and target cells following co-culture under the conditions used for membrane potential and permeability analysis in Figure 3a.** The Ssp6-susceptible target strain,  $\Delta$ ssp6 $\Delta$ sip6 expressing cytoplasmic GFP, was co-cultured with wild type (WT) or mutant ( $\Delta$ ssp6 or  $\Delta$ tssE) attacker strains expressing cytoplasmic mCherry for 4 h at an initial ratio of 1:1. Cells were recovered, imaged by fluorescence microscopy and numbers of green (GFP) and red (mCherry) cells counted using OMERO mTools. The relative numbers of attacker and target cells for each condition following co-culture is represented as a percentage of the total cell population. Around 1500 cells in total were counted for each condition in each replicate. Bars show mean  $\pm$  SEM, with individual data points superimposed (n=3 independent experiments). Source data are provided as a Source Data file.

## Supplementary Figure 5

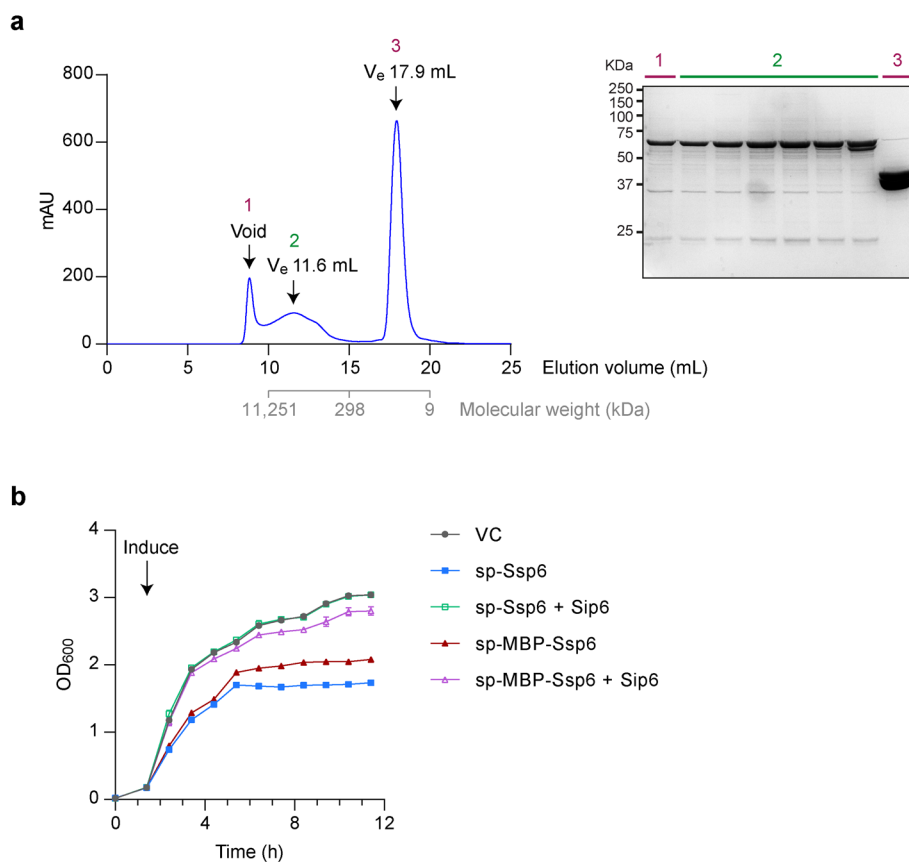

**Supplementary Figure 5. MBP-Ssp6 is oligomeric and retains toxin function.** (a) Size exclusion chromatography of MBP-Ssp6, following its initial isolation by dextrin affinity purification, using a calibrated Superose 6 Increase 10/300 GL column (GE Healthcare). For each peak, the elution volume ( $V_e$ ) is indicated. Analysis of fractions eluted during size exclusion chromatography by SDS-PAGE and Coomassie staining is shown on the right, with peak 2 (green fractions) containing the MBP-Ssp6 used for subsequent analyses. Peak 3 contains MBP only. (b) Growth of *E. coli* MG1655 carrying empty vector (VC, pBAD18-Kn) or plasmids directing the expression of the MBP-Ssp6 fusion protein with an N-terminal OmpA signal peptide (sp-MBP-Ssp6) or native Ssp6 with signal peptide (sp-Ssp6), each with or without co-expression of Sip6 (+ Sip6), in LB containing 0.2% L-arabinose. Points show mean  $\pm$  SEM (n=3 biological replicates). Source data are provided as a Source Data file.

## Supplementary Figure 6

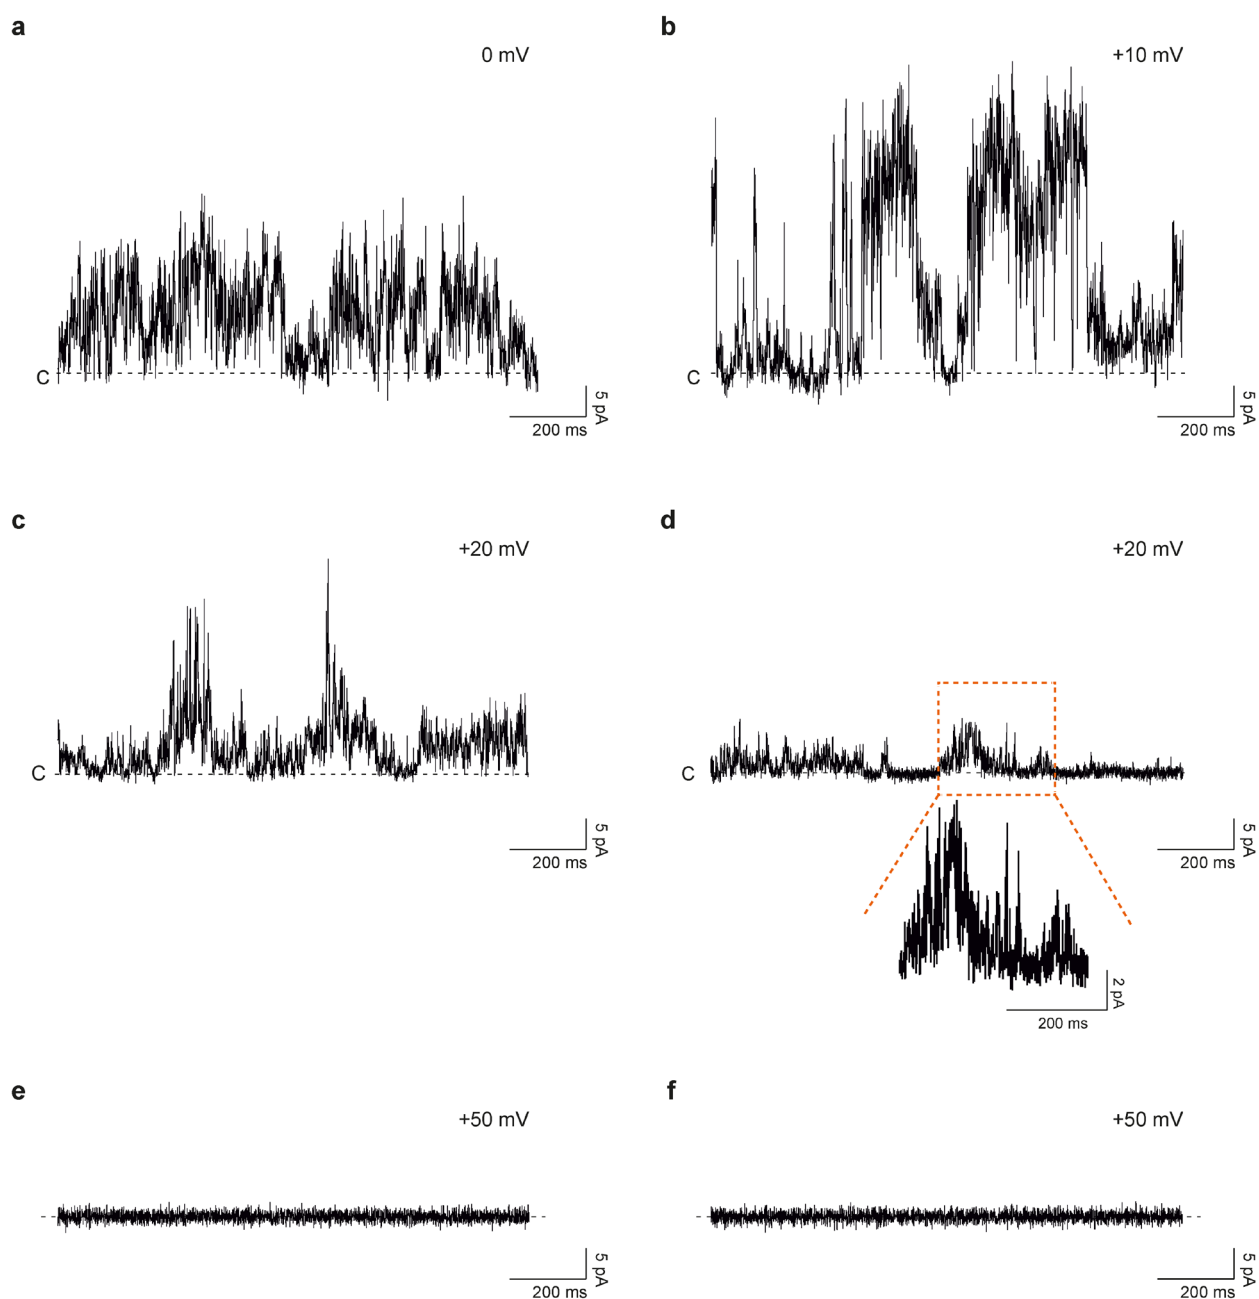

**Supplementary Figure 6. Gating characteristics of Ssp6.** (a,b) Representative gating of MBP-Ssp6 in a KCl gradient at a holding potential of 0 mV (panel a) and +10 mV (panel b). MBP-Ssp6 gates to more than one open state. When multiple Ssp6-MBP proteins incorporate into the bilayer coordinated gating is observed. (c, d) Examples of MBP-Ssp6 current fluctuations measured in bi-ionic conditions where 210 mM NaCl (panel c) or CaCl<sub>2</sub> (panel d) were added to the *cis* chamber, with 210 mM KCl in the *trans* chamber. In these conditions, MBP-Ssp6 channels retained coordinated and unstable gating. In panel d, a magnification of the MBP-Ssp6 gating is shown to aid clarity. In panels a-d, the traces shown are representative of four (panels a, b) or three (panels c, d) independent experiments, and the dotted line indicates the closed (C) state of the pore. (e, f) Measurement of current fluctuations following addition of purification buffer (panel e) or MBP alone (panel f); the dotted line shows the baseline zero current. No current fluctuations were observed in three independent experiments.



## Supplementary Figure 7

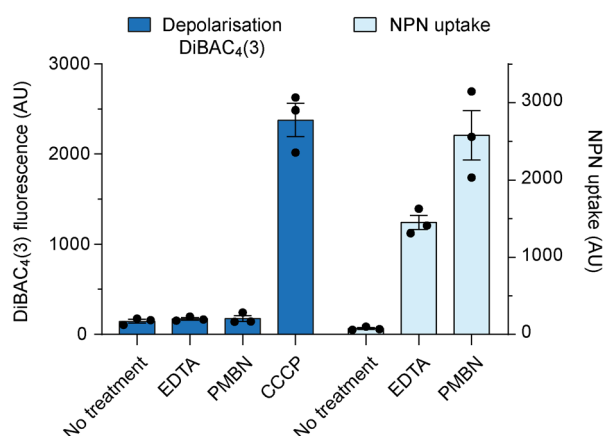

**Supplementary Figure 7. Treatments disrupting the integrity of the outer membrane do not lead to depolarisation of the inner membrane.** Cells of *E. coli* MG1655 were treated with EDTA or polymyxin B nonapeptide (PMBN) to disrupt the outer membrane, or CCCP as a control to dissipate the inner membrane potential, and membrane depolarisation was measured as DiBAC<sub>4</sub>(3) fluorescence. To confirm the activity of EDTA and PMBN under these conditions, outer membrane permeabilisation (NPN uptake) was measured in parallel, in both cases using a 96-well plate fluorimeter based assay. Healthy cells with no treatment represent the negative control. Bars show mean  $\pm$  SEM, with individual data points superimposed (n=3 independent experiments). Source data are provided as a Source Data file.

# Supplementary Figure 8

**a**

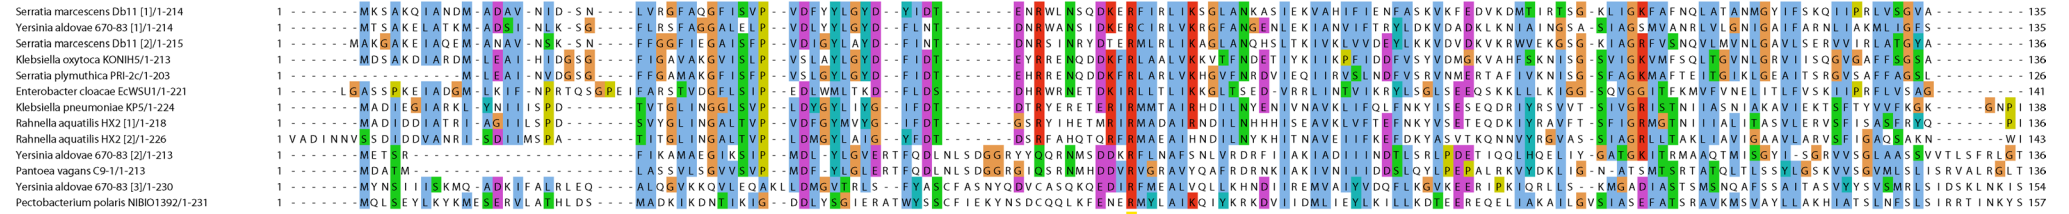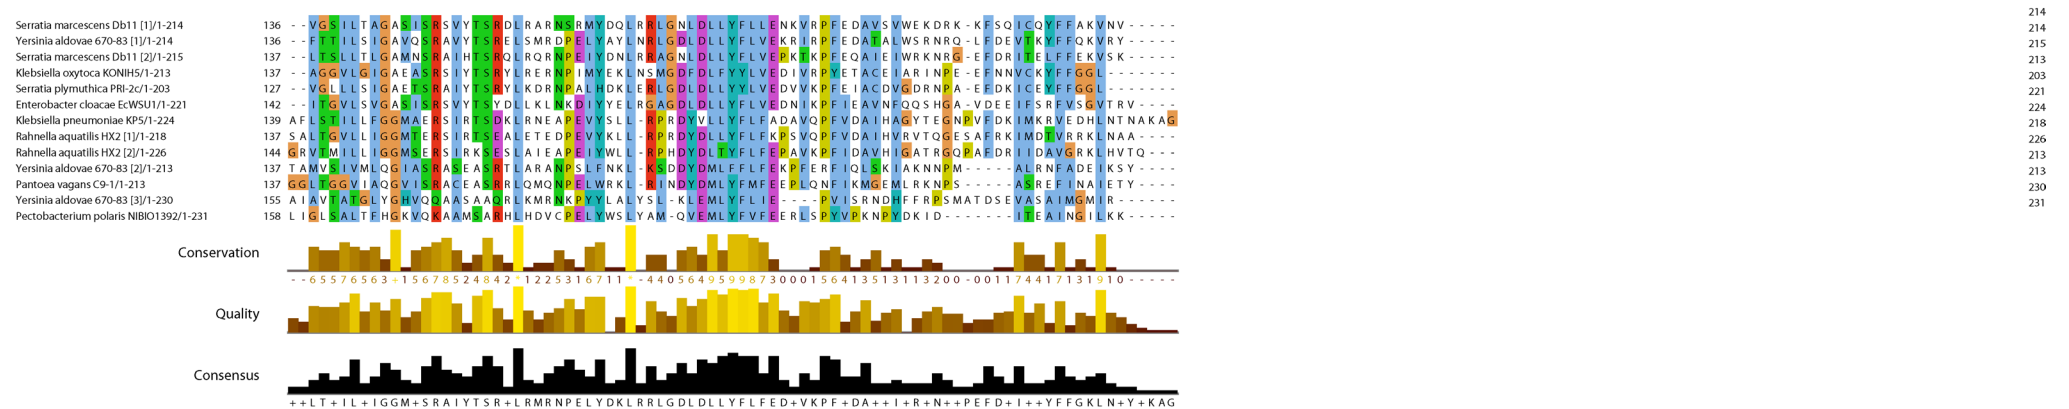

b

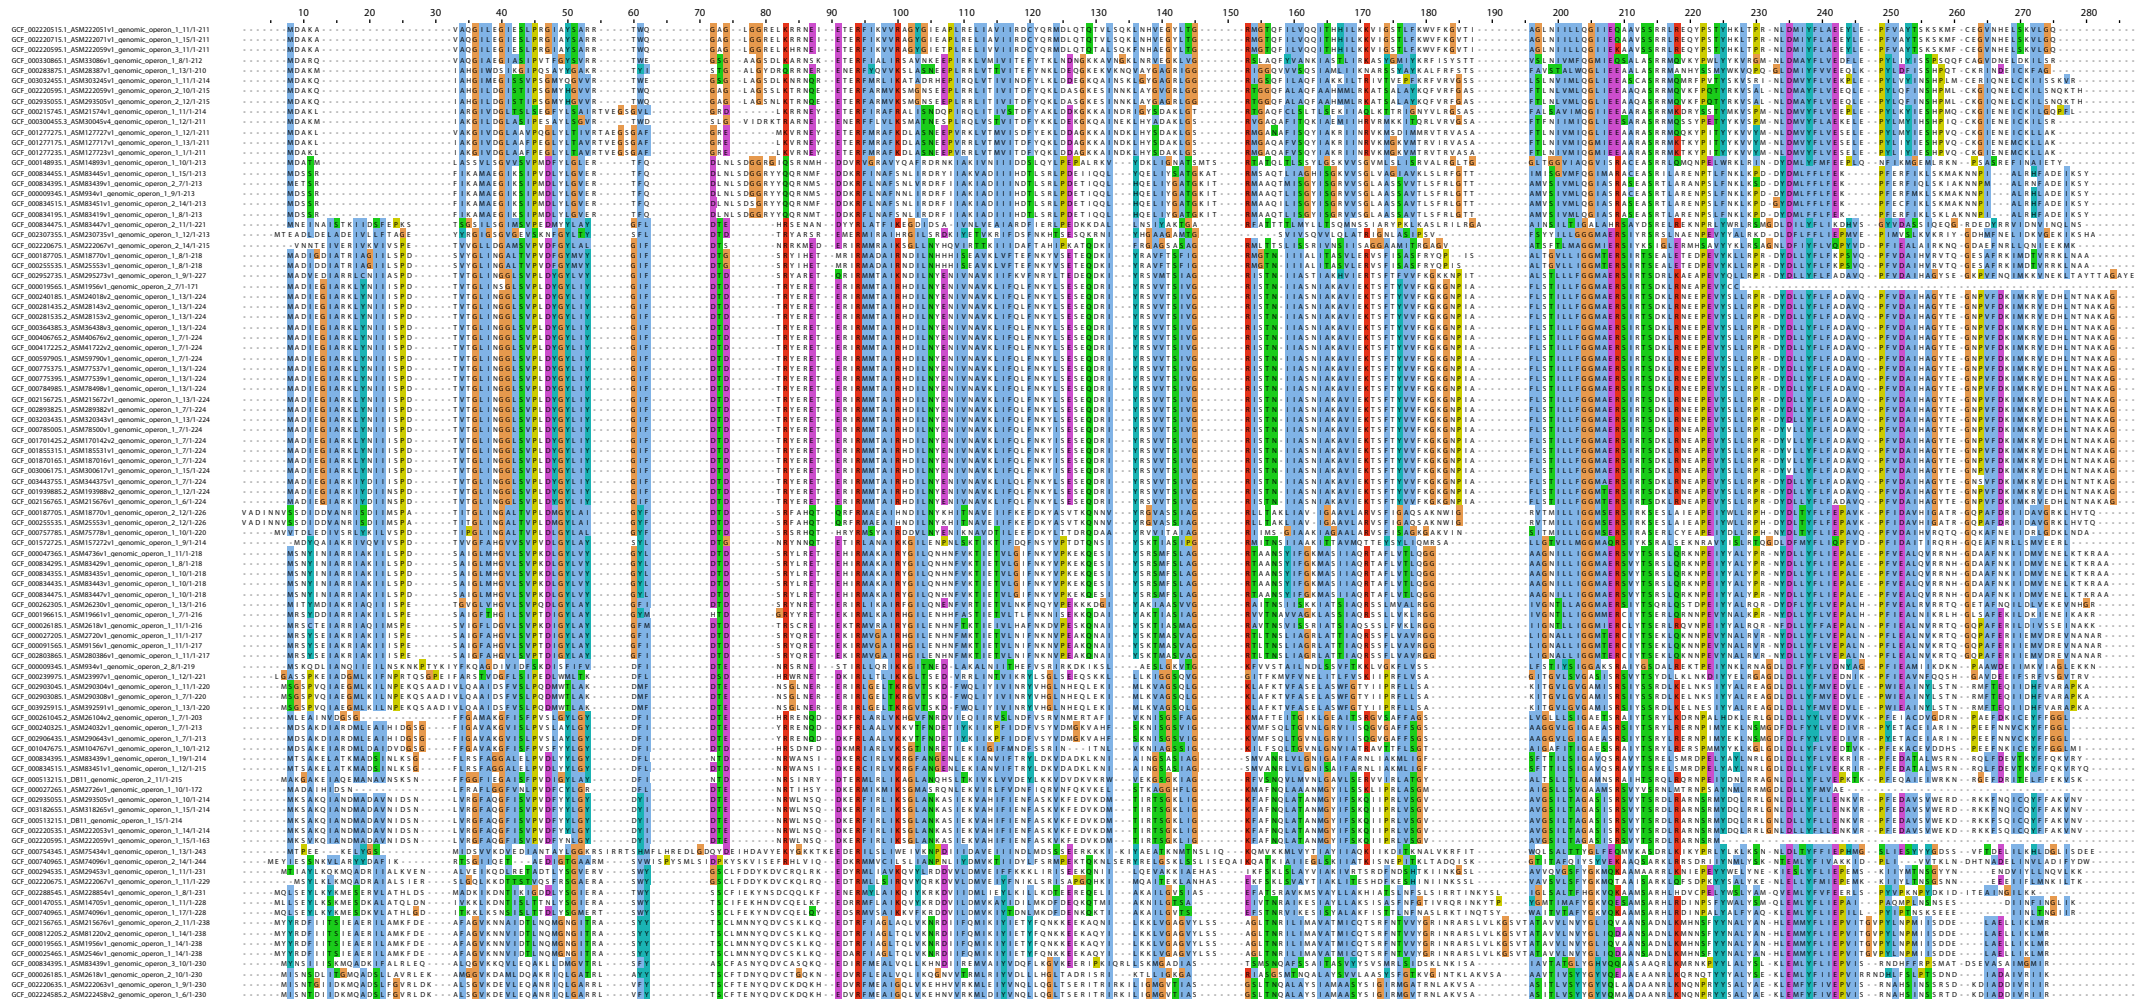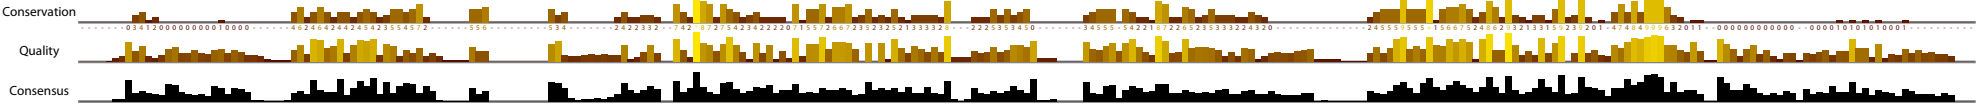

**Supplementary Figure 8. Multiple sequence alignment of Ssp6 homologues.** The amino acid sequence alignments of the Ssp6-like proteins used to generate the trees depicted in Figure 6 (panel a, selected examples) and Supplementary Figure 9 (panel b, all homologues identified) are visualised using Jalview with the ClustalX colour scheme (<http://www.jalview.org>). Details of the entries in (b), including the organism encoding the homologue, can be found in Supplementary Data 1.

# Supplementary Figure 9

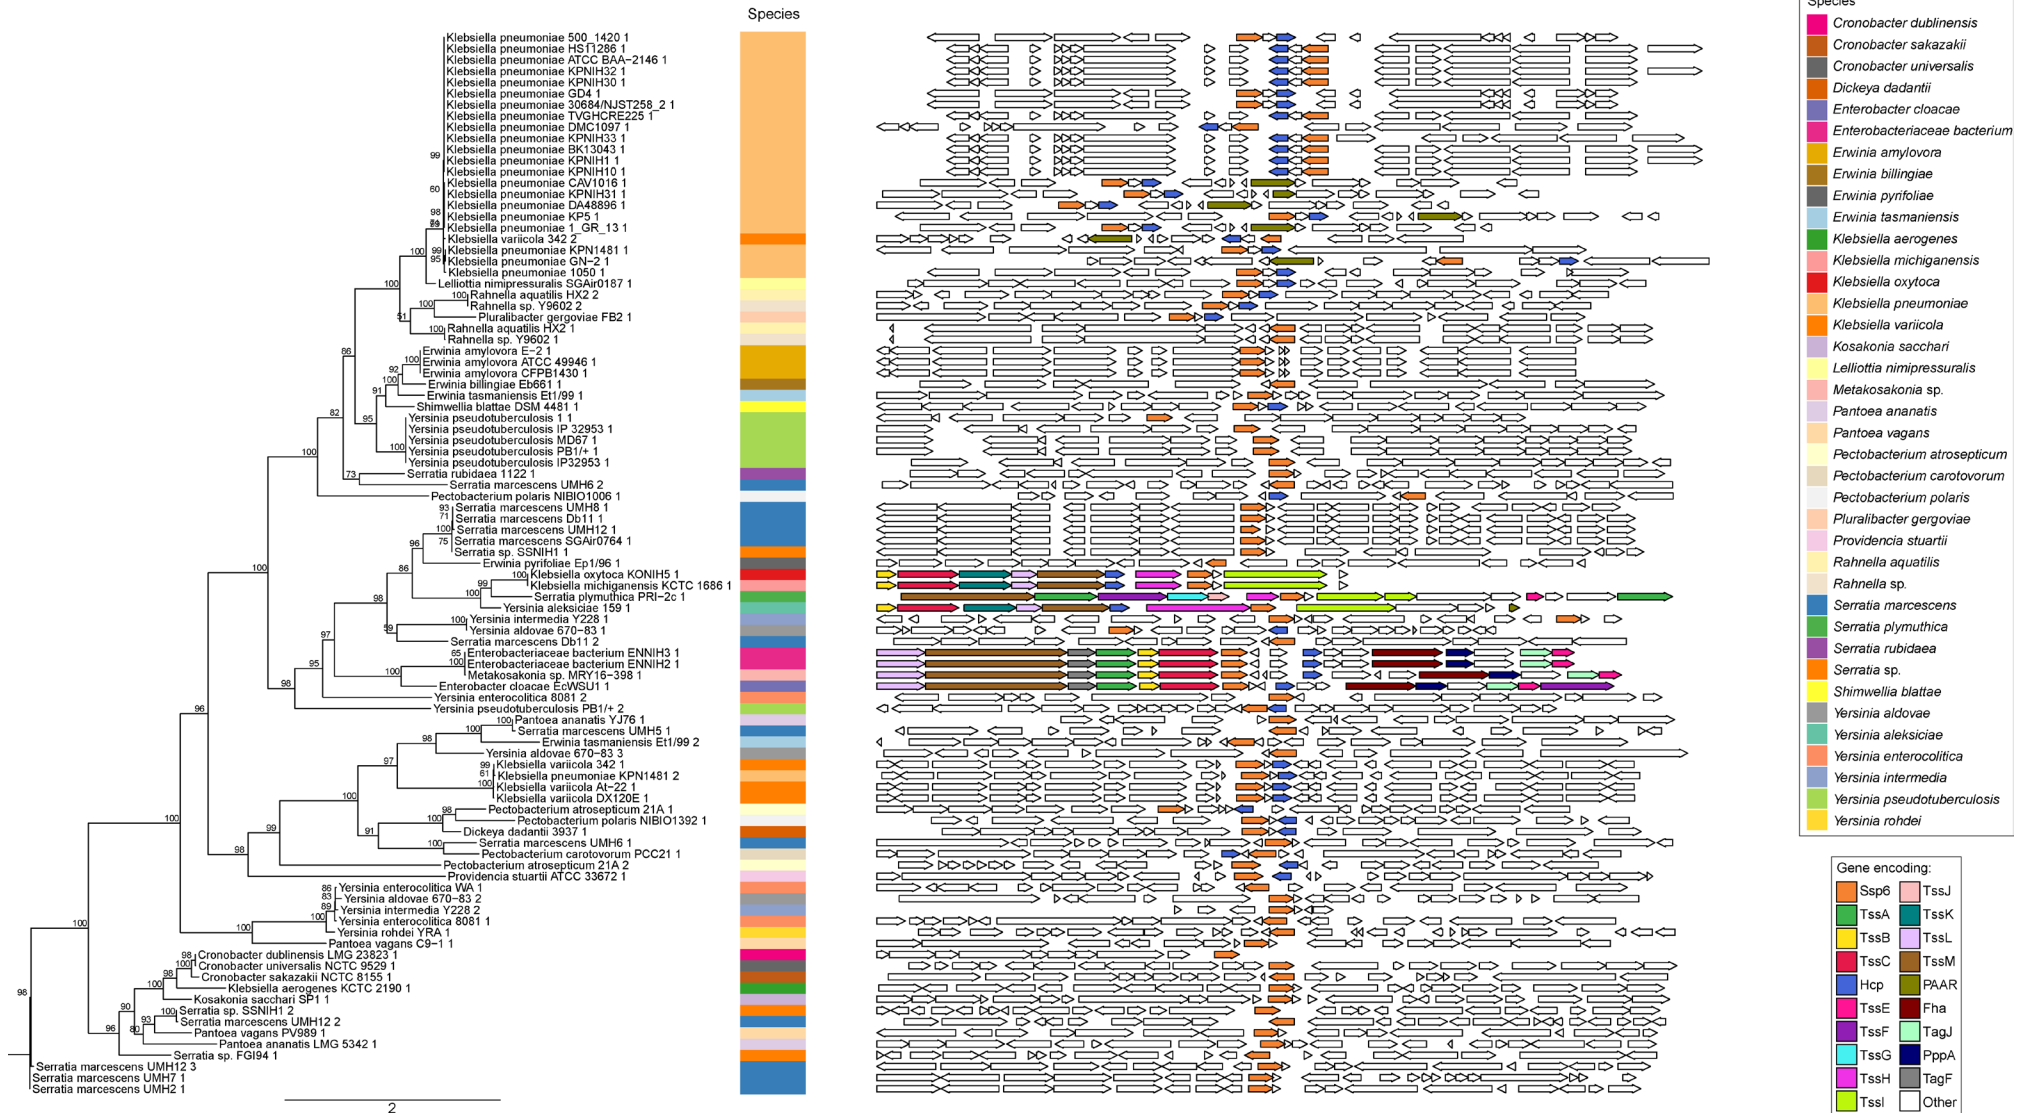

**Supplementary Figure 9. Full set of Ssp6-like proteins identified through bioinformatics analysis.** Phylogenetic tree and genetic context of homologues of Ssp6 identified using a HMMER search of complete, published bacterial genome sequences. Representative examples taken from this set are depicted in Figure 6 and details of the genome sequences and identified homologues are given in Supplementary Data 1. Note that small open reading frames downstream of *ssp6* encoding putative immunity proteins are frequently missed by the automated annotation; hence absence of such an open reading frame in the schematic does not imply such an immunity does not exist. Manual examination of a selection of such cases revealed that a candidate open reading frame downstream of the *ssp6*-like gene was present in each case as predicted. Genes whose boundaries extend beyond the selected region of interest are also not depicted.

### Supplementary Figure 10

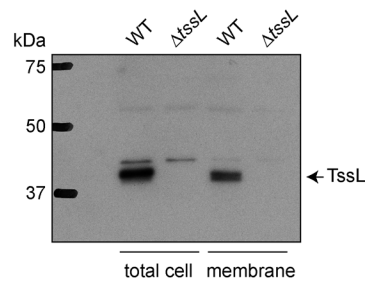

**Supplementary Figure 10. Validation of custom anti-TssL antibody.** Total cellular protein and total membrane protein samples were prepared from the wild type (WT) and a  $\Delta tssL$  mutant of *S. marcescens* Db10, separated by SDS-PAGE and subjected to immunoblotting with a rabbit polyclonal antibody raised against the purified periplasmic domain of TssL (SMDB11\_2254). Source data are provided as a Source Data file.

## Supplementary Figure 11

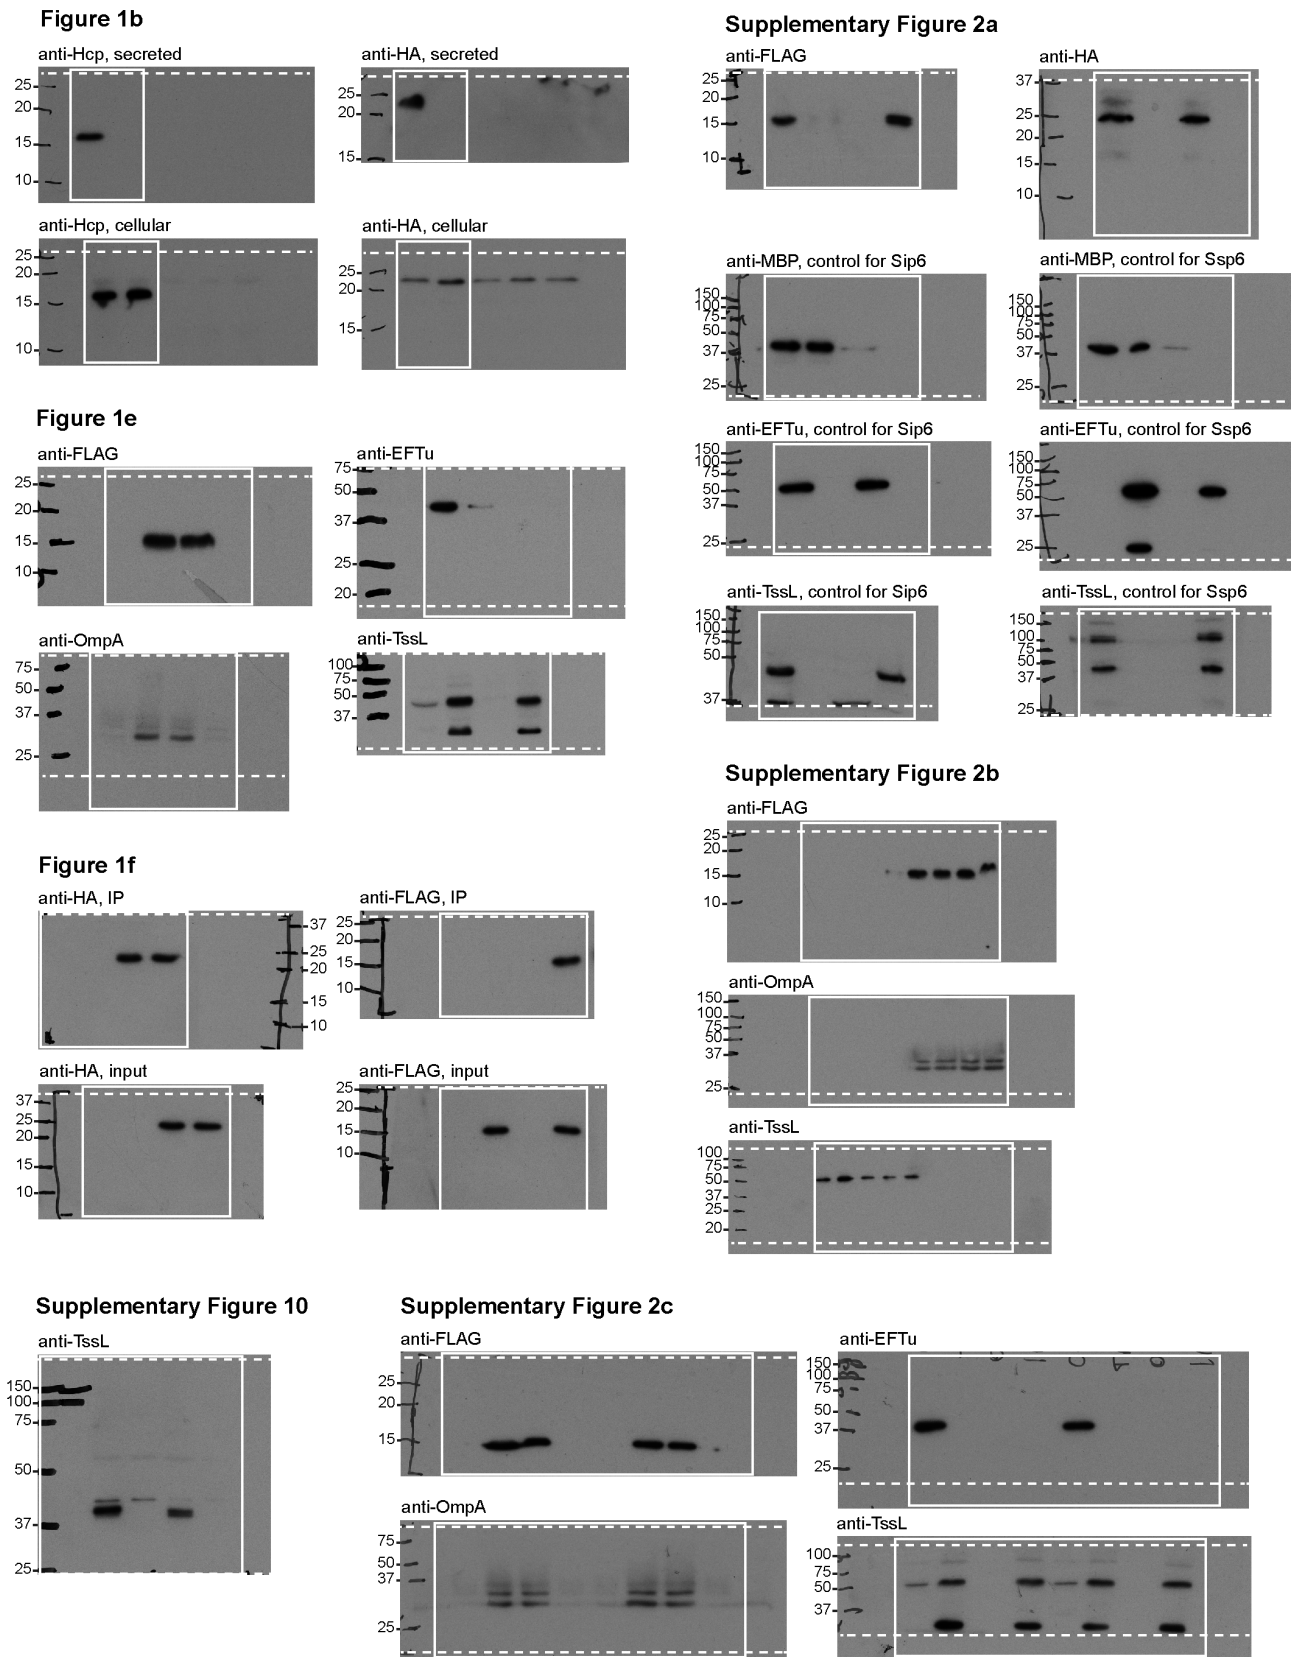

**Supplementary Figure 11. Uncropped immunoblot images.** White boxes indicate lanes included in Figures, dashed lines indicate where membranes were cut, and numbers correspond to molecular weight markers (kDa).



**Supplementary Table 1. Strains and Plasmids used in this study.**

| Name                       | Description/ genotype                                                                                                                                                                               | Source / Reference |
|----------------------------|-----------------------------------------------------------------------------------------------------------------------------------------------------------------------------------------------------|--------------------|
| <b>Strains</b>             |                                                                                                                                                                                                     |                    |
| <i>Serratia marcescens</i> |                                                                                                                                                                                                     |                    |
| Db10                       | Wild type                                                                                                                                                                                           | 1                  |
| SJC11                      | Db10 $\Delta tssE$ (SMDB11_2271)                                                                                                                                                                    | 2                  |
| SJC3                       | Db10 $\Delta tssH$ (SMDB11_2274)                                                                                                                                                                    | 2                  |
| KT74                       | Db10 $\Delta ssp6$ (SMDB11_4673)                                                                                                                                                                    | This study         |
| KT75                       | Db10 $\Delta ssp6\Delta sip6$ (SMDB11_4673, SMDB11_4672A)                                                                                                                                           | This study         |
| KT77                       | Db10 $\Delta ssp6\Delta sip6$ , Sm-resistant derivative                                                                                                                                             | This study         |
| KT121                      | Db10 Ssp6-HA (encodes Ssp6 [SMDB11_4673] with a C-terminal HA tag at the native chromosomal location)                                                                                               | This study         |
| KT123                      | Db10 Ssp6-HA, $\Delta tssE$                                                                                                                                                                         | This study         |
| KT101                      | Db10 Sip6-FLAG (encodes Sip6 [SMDB11_4672A] with a C-terminal 3xFLAG tag at the native chromosomal location)                                                                                        | This study         |
| GM021                      | Db10 Ssp6-HA, Sip6-FLAG                                                                                                                                                                             | This study         |
| AO07                       | Db10 $\Delta lacZ::P_{T5}-mCherry-kn^R$ ( <i>lacZ</i> , SMDB11_2462). Encodes cytoplasmic mCherry, IPTG-inducible and expressed constitutively at a low level.                                      | This study         |
| AO08                       | Db10 $\Delta tssE$ , $\Delta lacZ::P_{T5}-mCherry-kn^R$                                                                                                                                             | This study         |
| GM24                       | Db10 $\Delta ssp6$ , $\Delta lacZ::PT5-mCherry-kn^R$                                                                                                                                                | This study         |
| SAN195                     | Db10 $\Delta lacZ::P_{T5}-gfpmut2-kn^R$ . Encodes cytoplasmic GFP, IPTG-inducible and expressed constitutively at a low level.                                                                      | 3                  |
| GM04                       | Db10 $\Delta ssp6\Delta sip6$ , $\Delta lacZ::P_{T5}-gfpmut2-kn^R$ .                                                                                                                                | This study         |
| GM143                      | Db10 $\Delta 0810$ (SMDB11_0810)                                                                                                                                                                    | This study         |
| GM141                      | Db10 $\Delta 0810\Delta 0809$ (SMDB11_0810, SMDB11_0809)                                                                                                                                            | This study         |
| GM144                      | Db10 $\Delta ssp6$ , $\Delta 0810$                                                                                                                                                                  | This study         |
| GM142                      | Db10 $\Delta ssp6\Delta sip6$ , $\Delta 0810\Delta 0809$                                                                                                                                            | This study         |
| GM145                      | Db10 $\Delta 0810\Delta 0809$ , Sm-resistant derivative                                                                                                                                             | This study         |
| GM146                      | Db10 $\Delta ssp6\Delta sip6$ , $\Delta 0810\Delta 0809$ , Sm-resistant derivative                                                                                                                  | This study         |
| GM160                      | Db10 $\Delta ssp6$ , Sip6-FLAG                                                                                                                                                                      | This study         |
| <i>Escherichia coli</i>    |                                                                                                                                                                                                     |                    |
| MG1655                     | Wild type (model K-12 strain)                                                                                                                                                                       | 4                  |
| C43(DE3)                   | Protein overexpression strain; chromosomal $\lambda$ DE3 encodes IPTG-inducible T7 RNA polymerase F <sup>-</sup> <i>ompT hsdS</i> (r <sup>B</sup> -m <sup>B</sup> -) <i>gal dcm</i> $\lambda$ (DE3) | Lucigen            |
| CC118 $\lambda$ pir        | Cloning host and donor strain for pKNG101-derived allelic exchange plasmids ( $\lambda$ pir)                                                                                                        | 5                  |
| HH26<br>pNJ5000            | Mobilizing strain for conjugal transfer                                                                                                                                                             | 6                  |
| <b>Plasmids</b>            |                                                                                                                                                                                                     |                    |
| pSUPROM                    | Vector for constitutive expression of cloned genes under the control of the <i>E. coli</i> <i>tat</i> promoter (Kn <sup>R</sup> )                                                                   | 7                  |
| pBAD18-Kn                  | Arabinose-inducible expression vector; gene of interest is cloned downstream of the <i>P<sub>ara</sub></i> promoter (Kn <sup>R</sup> )                                                              | 8                  |
| pKNG101                    | Suicide vector for allelic exchange (Sm <sup>R</sup> , <i>sacBR</i> , <i>mobRK2</i> , <i>oriR6K</i> )                                                                                               | 9                  |
| pNIFTY-MBP                 | Expression vector for T7 polymerase-dependent expression of recombinant proteins fused with N-terminal MBP-His <sub>6</sub> (Ap <sup>R</sup> )                                                      | 10                 |

|         |                                                                                                                                                     |            |
|---------|-----------------------------------------------------------------------------------------------------------------------------------------------------|------------|
| pSC1273 | Coding sequence for Sip6-HA (SMDB11_4672A) in pSUPROM                                                                                               | This study |
| pSC1235 | Coding sequence for Ssp6 (SMDB11_4673) in pBAD18-Kn                                                                                                 | 11         |
| pSC1236 | Coding sequence for Omp <sub>ASP</sub> -Ssp6 fusion protein in pBAD18-Kn                                                                            | 11         |
| pSC1256 | Coding sequences for Ssp6 + Sip6 in pBAD18-Kn                                                                                                       | This study |
| pSC1271 | Coding sequence for Omp <sub>ASP</sub> -Ssp6 + Sip6 in pBAD18-Kn                                                                                    | This study |
| pSC1587 | Coding sequence for Omp <sub>ASP</sub> -MBP-Ssp6 + Sip6 in pBAD18-Kn                                                                                | This study |
| pSC1597 | Coding sequence for Omp <sub>ASP</sub> -MBP-Ssp6 in pBAD18-Kn                                                                                       | This study |
| pSC2549 | Coding sequence for Omp <sub>ASP</sub> -SMBD11_0810 in pBAD18-Kn                                                                                    | This study |
| pSC2561 | Coding sequence for Omp <sub>ASP</sub> -SMBD11_0810 + SMDB11_0809 in pBAD18-Kn                                                                      | This study |
| pSC1270 | Coding sequence for Ssp6 in pNIFTY-MBP                                                                                                              | This study |
| pSC1264 | pKNG101-derived allelic exchange plasmid for the generation of chromosomal in-frame $\Delta$ <i>ssp6</i> deletion                                   | This study |
| pSC1266 | pKNG101-derived allelic exchange plasmid for the generation of chromosomal in-frame $\Delta$ <i>ssp6</i> $\Delta$ <i>sip6</i> deletion              | This study |
| pSC1311 | pKNG101-derived allelic exchange plasmid for the generation of Ssp6-HA allele at the normal chromosomal location                                    | This study |
| pSC1290 | pKNG101-derived allelic exchange plasmid for the generation of Sip6-3xFLAG allele at the normal chromosomal location                                | This study |
| pSC1509 | pKNG101-derived allelic exchange plasmid for the generation of Sip6-3xFLAG allele at the normal chromosomal location of strains harbouring Ssp6-HA  | This study |
| pSC2553 | pKNG101-derived allelic exchange plasmid for the generation of chromosomal in-frame $\Delta$ <i>SMDB11_0810</i> deletion                            | This study |
| pSC2554 | pKNG101-derived allelic exchange plasmid for the generation of chromosomal in-frame $\Delta$ <i>SMDB11_0810</i> $\Delta$ <i>SMD11_0809</i> deletion | This study |
| pSC1706 | pKNG101-derived allelic exchange plasmid for the generation of chromosomal $\Delta$ <i>lacZ::P<sub>T5</sub>-mCherry-kn<sup>R</sup></i>              | This study |
| pSC2575 | pKNG101-derived allelic exchange plasmid for the generation of chromosomal in-frame $\Delta$ <i>ssp6</i> deletion in strains harbouring Sip6-FLAG   | This study |

---

**Supplementary Table 2. Oligonucleotide primers and additional details for plasmid construction**

| Plasmid | Sequence of relevant primers (5'-3') <sup>a</sup> | Description                                                                                                                                                                   |
|---------|---------------------------------------------------|-------------------------------------------------------------------------------------------------------------------------------------------------------------------------------|
| pSC1264 | TATATCTAGAGGGATCAGTTCGATGTGCG                     | Forward primer to clone upstream region of SMDB11_4673 in pKNG101 ( <i>Xba</i> I)                                                                                             |
|         | TATAAAGCTTACCTTTTGCCATGACTCAATTCC                 | Reverse primer to clone upstream region of SMDB11_4673 in pKNG101 ( <i>Hind</i> III)                                                                                          |
|         | TATAAAGCTTTTTGAAAAGGTGTCGAAATGAAGG                | Forward primer to clone downstream region of SMDB11_4673 in pKNG101 ( <i>Hind</i> III)                                                                                        |
|         | TATAGGGCCCCGACGACATCAAGTACCTGTTCG                 | Reverse primer to clone downstream region of SMDB11_4673 in pKNG101 ( <i>Apa</i> I)                                                                                           |
| pSC1266 | TATATCTAGAGGGATCAGTTCGATGTGCG                     | Forward primer to clone upstream region of SMDB11_4673 and SMDB11_4672A in pKNG101 ( <i>Xba</i> I)                                                                            |
|         | TATAAAGCTTACCTTTTGCCATGACTCAATTCC                 | Reverse primer to clone upstream region of SMDB11_4673 and SMDB11_4672A in pKNG101 ( <i>Hind</i> III)                                                                         |
|         | TATAAAGCTTGGCGTTTAGAGCAAGCGTAGAG                  | Forward primer to clone downstream region of SMDB11_4673 and SMDB11_4672A in pKNG101 ( <i>Hind</i> III)                                                                       |
|         | TATAGGGCCCCGACGCAAGAAAGACGG                       | Reverse primer to clone downstream region of SMDB11_4673 and SMDB11_4672A in pKNG101 ( <i>Apa</i> I)                                                                          |
| pSC1290 | TATATCTAGACCAAGAGATGGCGAACGC                      | Forward primer to amplify SMDB11_4672A for generation of Sip6-3xFLAG fusion construct by overlap PCR ( <i>Xba</i> I)                                                          |
|         | CACCGTCATGGTCTTTGTAGTCAACGCCATCATGGAAC TTC        | Reverse primer to amplify SMDB11_4672A for generation of Sip6-3xFLAG fusion construct by overlap PCR                                                                          |
|         | GAAGTTCATGATGGCGTTGACTACAAAGACCATGAC GGTG         | Forward primer to amplify 3x-FLAG tag (see below) for generation of Sip6-3xFLAG fusion construct by overlap PCR                                                               |
|         | GAACGCTCTACGCTTGCTCTACTTGTCATCGTCATCCT TGTAATC    | Reverse primer to amplify 3x-FLAG tag for generation of Sip6-3xFLAG fusion construct by overlap PCR                                                                           |
|         | GATTACAAGGATGACGATGACAAGTAGAGCAAGCGTA GAGCGTTC    | Forward primer to amplify SMDB11_4672A downstream region for generation of Sip6-3xFLAG fusion construct by overlap PCR                                                        |
|         | TATAGGGCCCCGACGCAAGAAAGACGG                       | Reverse primer to amplify SMDB11_4672A downstream region for generation of Sip6-3xFLAG fusion construct by overlap PCR ( <i>Apa</i> I)                                        |
| pSC1509 | TATATCTAGAGTCGATGTAGATAAAGTCAAAGATG               | Forward primer to amplify SMDB11_4672A for generation of Sip6-3xFLAG fusion construct by overlap PCR ( <i>Xba</i> I), to incorporate 3xFLAG tag in strains harbouring Ssp6-HA |
|         | Other primers as pSC1290                          |                                                                                                                                                                               |
| pSC2553 | TATATCTAGACACGCGCTTCGGCGGTATAAC                   | Forward primer to clone upstream region of SMDB11_0810 in pKNG101 ( <i>Xba</i> I)                                                                                             |
|         | TATAAAGCTTGGCATCCGCCATGTCGT                       | Reverse primer to clone upstream region of SMDB11_0810 in pKNG101 ( <i>Hind</i> III)                                                                                          |
|         | TATAAAGCTTTTTGCAAAGGTTAACGTATGAAGAAC              | Forward primer to clone downstream region of SMDB11_0810 in pKNG101 ( <i>Hind</i> III)                                                                                        |
|         | TATAGTCGACCAGCGATCATGGCTATGC                      | Reverse primer to clone downstream region of SMDB11_0810 in pKNG101 ( <i>Sal</i> I)                                                                                           |
| pSC2554 | TATATCTAGACACGCGCTTCGGCGGTATAAC                   | Forward primer to clone upstream region of SMDB11_0810 and SMDB11_0809 in pKNG101 ( <i>Xba</i> I)                                                                             |
|         | TATAAAGCTTGGCATCCGCCATGTCGT                       | Reverse primer to clone upstream region of SMDB11_0810 and SMDB11_0809 in pKNG101 ( <i>Hind</i> III)                                                                          |
|         | TATAAAGCTTGATTAATAACATTGTGTTC                     | Forward primer to clone downstream region of SMDB11_0810 and SMDB11_0809 in pKNG101 ( <i>Hind</i> III)                                                                        |

|         |                                                                                                                |                                                                                                                                                                                                                                                                |
|---------|----------------------------------------------------------------------------------------------------------------|----------------------------------------------------------------------------------------------------------------------------------------------------------------------------------------------------------------------------------------------------------------|
|         | TATAGTCGACCAACGGCTATCAAAAGGTC                                                                                  | Reverse primer to clone downstream region of SMDB11_0810 and SMDB11_0809 in pKNG101 ( <i>ApaI</i> )                                                                                                                                                            |
| pSC1270 | TATAGGCGCCATGGCAAAGGTGCGAAGG<br>TATAAAGCTTCATTTGACACCTTTTCAAAAATAGC                                            | Forward primer to clone SMDB11_4673 in pNIFTY-MBP ( <i>KasI</i> )<br>Reverse primer to clone SMDB11_4673 in pNIFTY-MBP ( <i>HindIII</i> )                                                                                                                      |
| pSC1273 | TATAGGATCCATGAAGGTTTTTTCAGTGCTCATATCAAG<br>TATAGTCGACTTATGCATAATCAGGAACATCATAAGG<br>ATAAACGCCATCATGGAACCTTCATG | Forward primer to clone SMDB11_4672A in pSUPROM ( <i>BamHI</i> )<br>Reverse primer to clone SMDB11_4672A in pSUPROM, incorporating a C-terminal HA tag ( <i>Sall</i> )                                                                                         |
| pSC1256 | TATAGAATTCTCCAACGCCCCCTACG<br>TATATCTAGAGTGAAGCTGAAAGCCTTCCGG                                                  | Forward primer to clone SMDB11_4673, including RBS, and SMDB11_4672A in pBAD18-Kn ( <i>EcoRI</i> )<br>Reverse primer to clone SMDB11_4673 and SMDB11_4672A in pBAD18-Kn ( <i>XbaI</i> )                                                                        |
| pSC1271 | TATATCTAGAGCAAAAGGTGCGAAGGAAATC<br>TATAGTCGACTGCTCTAAACGCCATCATGG                                              | Forward primer to clone SMDB11_4673 and SMDB11_4672A into pSC1236 for fusion of SMDB11_4673 with OmpA <sub>sp</sub> ( <i>XbaI</i> )<br>Reverse primer to clone SMDB11_4673 and SMDB11_4672A in pSC1236 ( <i>Sall</i> )                                         |
| pSC1587 | TATAGTCGACGAAAAGGTGTCGAAATGAAGGTTTTT<br>CAGTGCTC<br>TATAGCATGCCTAAACGCCATCATGGAACCTTC                          | Forward primer to clone SMDB11_4672A into pSC1597 ( <i>Sall</i> )<br>Reverse primer to clone SMDB11_4672A into pSC1597 ( <i>SphII</i> )                                                                                                                        |
| pSC1597 | TATATGTAGAATGAAAATCGAAGAAGGTAAACTG<br>TATAGTCGACTCATTTCGACACCTTTTCAAAAATAGC                                    | Forward primer to amplify SMDB11_4673 incorporating a N-terminal MBP tag from pSC1270, and clone into pSC1236 ( <i>XbaI</i> )<br>Reverse primer to amplify SMDB11_4673 incorporating a N-terminal MBP tag from pSC1270, and clone into pSC1236 ( <i>Sall</i> ) |
| pSC2549 | TATATCTAGAGCGGATGCCGTAACATTGACAGC<br>TATAGTCGACTTATGCATAATCAGGAACATCATAAGG<br>ATAAACGCCATCATGGAACCTTCATG       | Forward primer to clone OmpA <sub>sp</sub> SMDB11_0810 in pBAD18-Kn ( <i>XbaI</i> )<br>Reverse primer to clone OmpA <sub>sp</sub> SMDB11_0810 in pBAD18-Kn ( <i>Sall</i> )                                                                                     |
| pSC2561 | TATAGTCGACAGAGGACGTTAAATGAAGAACTTTAT<br>GCTG<br>TATAGTCGACTCATAACGTTAACCTTTG                                   | Forward primer to clone SMDB11_0809 incorporating RBS from SMDB11_2264 in pSC2549 ( <i>Sall</i> )<br>Reverse primer to clone SMDB11_0809 incorporating RBS from SMDB11_2264 in pSC2549 ( <i>PstI</i> )                                                         |

| Plasmid | Relevant information |
|---------|----------------------|
|---------|----------------------|

|                   |                                                                                                                                                                                                                                                                                                                                                                                                                                                        |
|-------------------|--------------------------------------------------------------------------------------------------------------------------------------------------------------------------------------------------------------------------------------------------------------------------------------------------------------------------------------------------------------------------------------------------------------------------------------------------------|
| pSC1290 & pSC1509 | Nucleotide sequence of 3xFLAG tag:<br>GACTACAAAGACCATGACGGTGATTATAAAGATCATGATATCGATTACAAGGATGACGATGACAAGTAG                                                                                                                                                                                                                                                                                                                                            |
| pSC2575           | The same primers were used as for pSC1264 but the template was genomic DNA from the Sip6-FLAG strain                                                                                                                                                                                                                                                                                                                                                   |
| pSC1706           | Synthetic insert produced by Invitrogen GeneArt (ThermoFisher) containing the mCherry sequence from pmCherry-N1 and used to replace P <sub>T5</sub> - <i>gfpmut2</i> with P <sub>T5</sub> - <i>mCherry</i> ( <i>BamHI</i> and <i>Sall</i> ) in pSAN72 <sup>3</sup>                                                                                                                                                                                     |
| pSC1311           | Synthetic insert produced by Invitrogen GeneArt (ThermoFisher):<br>Contains sequence encoding the final 206 amino acids of SMDB11_4673 (not including the stop codon) immediately followed by an HA tag (YPYDVPDYA) then the final five amino acids and stop codon of SMDB11_4673 (repeated to preserve translation of the overlapping downstream gene) and then the following 596 nucleotides downstream of SMDB11_4673 ( <i>XbaI</i> - <i>ApaI</i> ) |

<sup>a</sup>Incorporated restriction sites for cloning into the respective vector are underlined.

## Supplementary References

1. Flyg, C., Kenne, K. & Boman, H.G. Insect pathogenic properties of *Serratia marcescens*: phage-resistant mutants with a decreased resistance to *Cecropia* immunity and a decreased virulence to *Drosophila*. *Microbiology* **120**, 173-181 (1980).
2. Murdoch, S.L. *et al.* The opportunistic pathogen *Serratia marcescens* utilizes Type VI secretion to target bacterial competitors. *Journal of Bacteriology* **193**, 6057-6069 (2011).
3. Gerc, A.J. *et al.* Visualization of the *Serratia* Type VI secretion system reveals unprovoked attacks and dynamic assembly. *Cell Reports* **12**, 2131-2142 (2015).
4. Blattner, F.R. *et al.* The complete genome sequence of *Escherichia coli* K-12. *Science* **277**, 1453-1462 (1997).
5. Herrero, M., de Lorenzo, V. & Timmis, K.N. Transposon vectors containing non-antibiotic resistance selection markers for cloning and stable chromosomal insertion of foreign genes in Gram-negative bacteria. *Journal of Bacteriology* **172**, 6557-6567 (1990).
6. Grinter, N.J. A broad-host-range cloning vector transposable to various replicons. *Gene* **21**, 133-143 (1983).
7. Jack, R.L. *et al.* Coordinating assembly and export of complex bacterial proteins. *The EMBO Journal* **23**, 3962-3972 (2004).
8. Guzman, L.-M., Belin, D., Carson, M.J. & Beckwith, J. Tight regulation, modulation, and high-level expression by vectors containing the arabinose P<sub>BAD</sub> promoter. *Journal of Bacteriology* **177**, 4121-4130 (1995).
9. Kaniga, K., Delor, I. & Cornelis, G.R. A wide-host-range suicide vector for improving reverse genetics in Gram-negative bacteria: inactivation of the *blaA* gene of *Yersinia enterocolitica*. *Gene* **109**, 137-141 (1991).
10. Striebeck, A., Robinson, D.A., Schüttelkopf, A.W. & van Aalten, D.M. Yeast Mnn9 is both a priming glycosyltransferase and an allosteric activator of mannan biosynthesis. *Open Biology* **3**, 130022 (2013).
11. Fritsch, M.J. *et al.* Proteomic identification of novel secreted antibacterial toxins of the *Serratia marcescens* Type VI secretion system. *Molecular & Cellular Proteomics* **12**, 2735-2749 (2013).
