# Supplementary material for: A family of Type VI secretion system effector proteins that form ion-selective pores
Source: PubMed Central journal article supplement (PMC6889166; doi:10.1038/s41467-019-13439-0), 2019-12-02
Supplement: 41467_2019_13439_MOESM2_ESM.pdf [file 41467_2019_13439_MOESM2_ESM.pdf]

## **Description of Additional Supplementary Files**

File Name: Supplementary Data 1

Description: Details of Ssp6 homologues identified using HMMER.
